# Supplementary material
Source: PubMed Central journal article supplement (PMC7857434)
Supplement: EMBR-22-e50613-s001.pdf [file EMBR-22-e50613-s001.pdf]

## Expanded View Figures

**Figure EV1. Evaluation of cell death after *P. aeruginosa* infection.**

A–D A549 cells were either left uninfected (NI) or infected for 4 h with WT and different *P. aeruginosa* mutants. Cells were then stained with Sytox-green (A, C) or propidium iodide (PI) (B, D) and the percentage of dead cells was analyzed by flow cytometry. Data are mean  $\pm$  SD from three independent experiments; one-way ANOVA analysis followed Dunn's multiple-comparison posttest t,  $*P \leq 0.05$ .

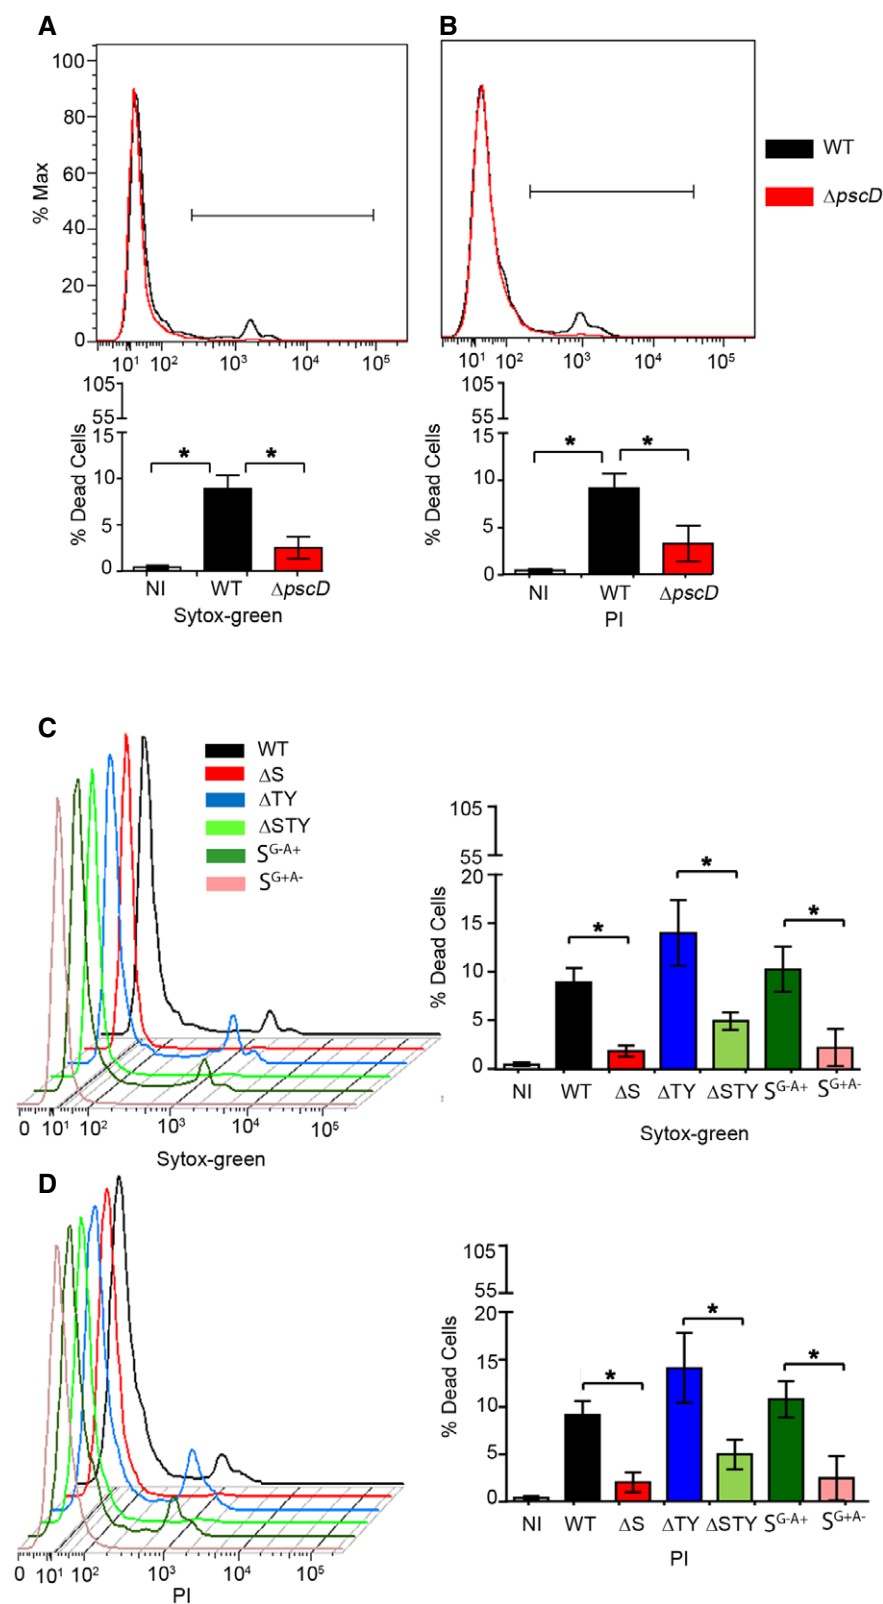

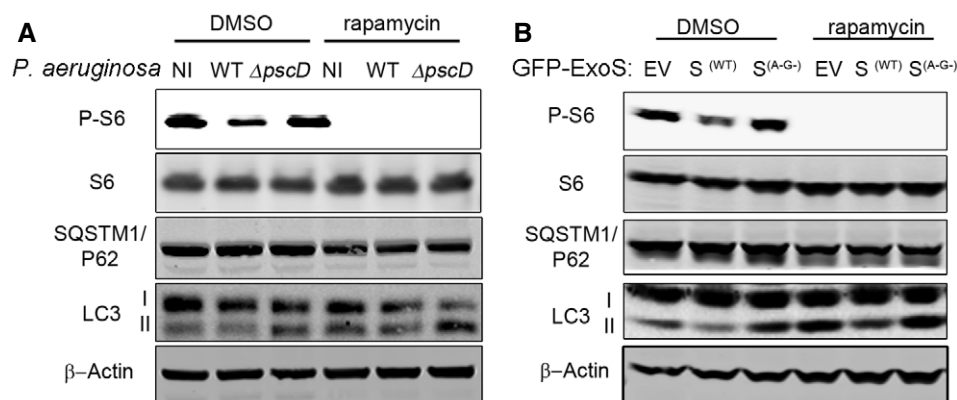

**Figure EV2. Induction of autophagy was attenuated by *P. aeruginosa* T3SS ExoS.**

A A549 cells were treated for 16 h with DMSO or rapamycin. Cells were then left uninfected (NI) or infected for 4 h with WT or  $\Delta pscD$  *P. aeruginosa* and cell lysates were evaluated by immunoblotting.

B A549 cells were transfected, for 24 h, with a plasmid containing an empty vector (EV), GFP-ExoS or an inactive mutant (GFP-ExoS<sup>G-A-</sup>). Cells were then treated for 16 h with DMSO or rapamycin and cell lysates were evaluated by immunoblotting.

Source data are available online for this figure.

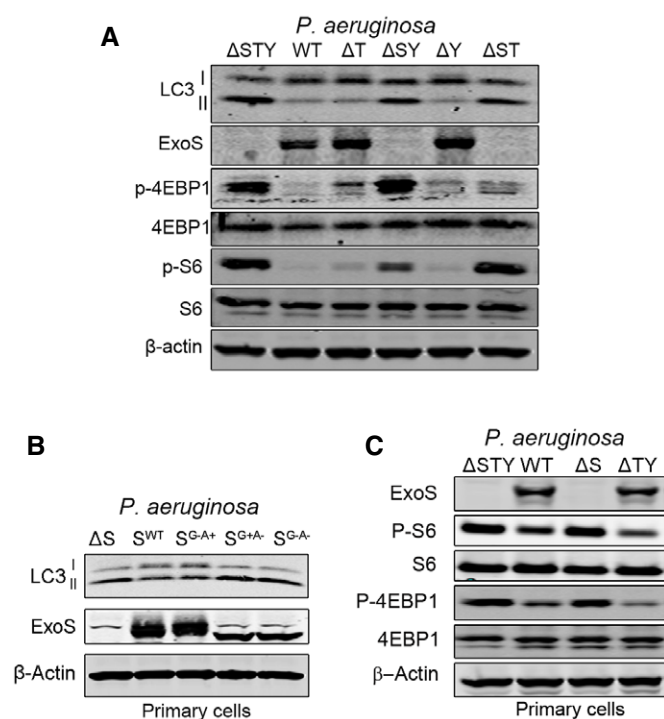

**Figure EV3. ExoS ADP-ribosyltransferase has the same effect on autophagy in primary epithelial cells; Single cytotoxin ExoT or ExoY does not affect mTOR or autophagy.**

A–C A549 cells (A) and primary NHBE cells (B, C) were infected for 4 h, with WT or *P. aeruginosa* mutants ( $\Delta$ STY,  $\Delta$ T,  $\Delta$ SY,  $\Delta$ Y,  $\Delta$ ST  $S^{WT}$ ,  $S^{G-A-}$ ,  $S^{G-A+}$ , and  $S^{G+A-}$ ), and cell lysate were evaluated by immunoblotting using indicated antibodies. *P. aeruginosa* mutant strains legend:  $S^{WT}$  (*P. aeruginosa* contains only active ExoS),  $S^{G-A+}$  (*P. aeruginosa* contains only ExoS with loss-of-function mutations in the GTPase-activating domain),  $S^{G+A-}$  (*P. aeruginosa* contains ExoS with loss-of-function in the ADP ribosylation domain),  $S^{G-A-}$  (*P. aeruginosa* contains a nonfunctional ExoS);  $\Delta$ STY (mutant deficient for the three cytotoxins),  $\Delta$ T (deficient for ExoT but still express ExoS and ExoY cytotoxins),  $\Delta$ SY (deficient for ExoS and ExoY only express ExoT),  $\Delta$ Y (deficient for ExoY but still express ExoS and ExoT cytotoxins),  $\Delta$ ST (deficient for ExoS and ExoT only express ExoY).

Source data are available online for this figure.

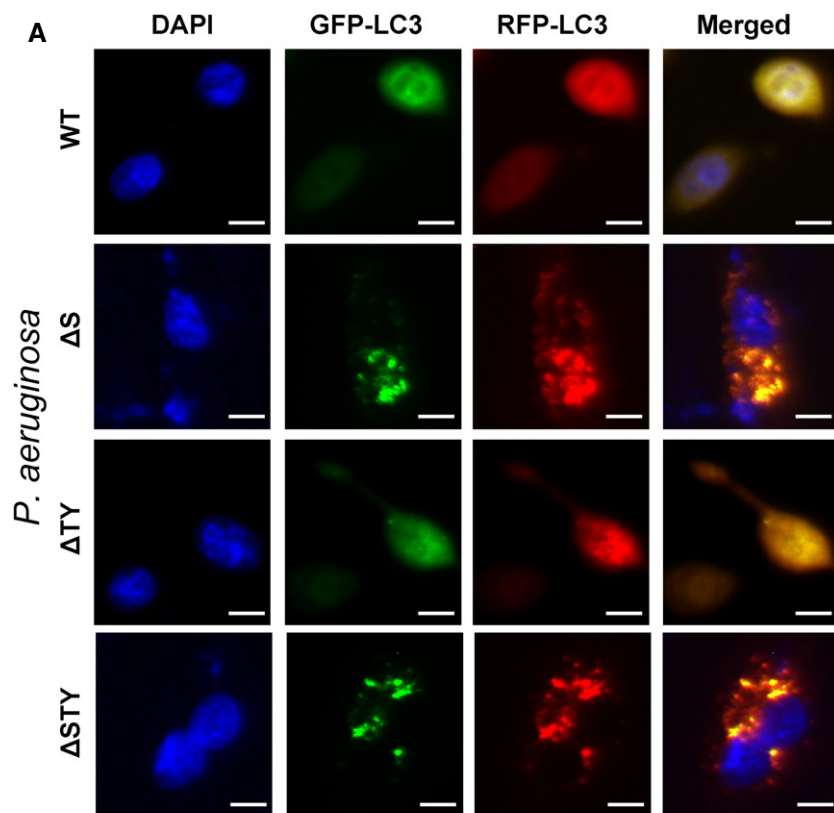

**Figure EV4. ExoS reduced autophagosome and autolysosome formation.**

A A549 cells, transfected with RFP-GFP-LC3 vectors for 24 h, were infected with different *P. aeruginosa* mutant strains. Representative images from fluorescence microscopy assays were shown. Scale bars: 10  $\mu$ m.

B Quantitative analysis of yellow puncta generated from overlapping GFP and RFP puncta (represent autophagosome) and RFP-LC3 puncta (represent autolysosome). The puncta from more than 100 cells were counted and the ratios of these puncta per cell are shown. Data are mean  $\pm$  SD from three independent experiments. The significance of differences between treatments was determined using two-tailed Student's *t*-test with Welch's correction,  $*P \leq 0.05$ .

Source data are available online for this figure.

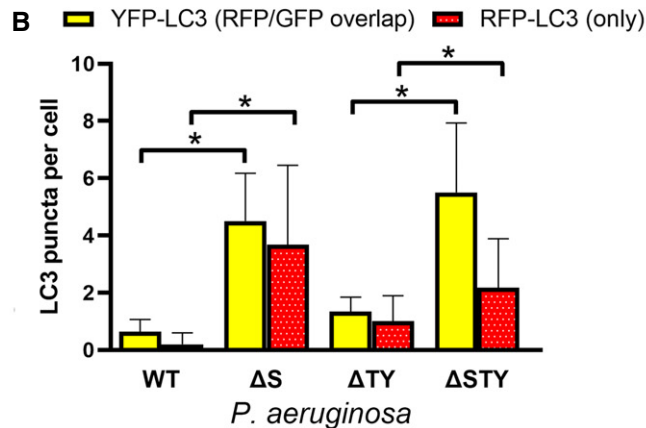

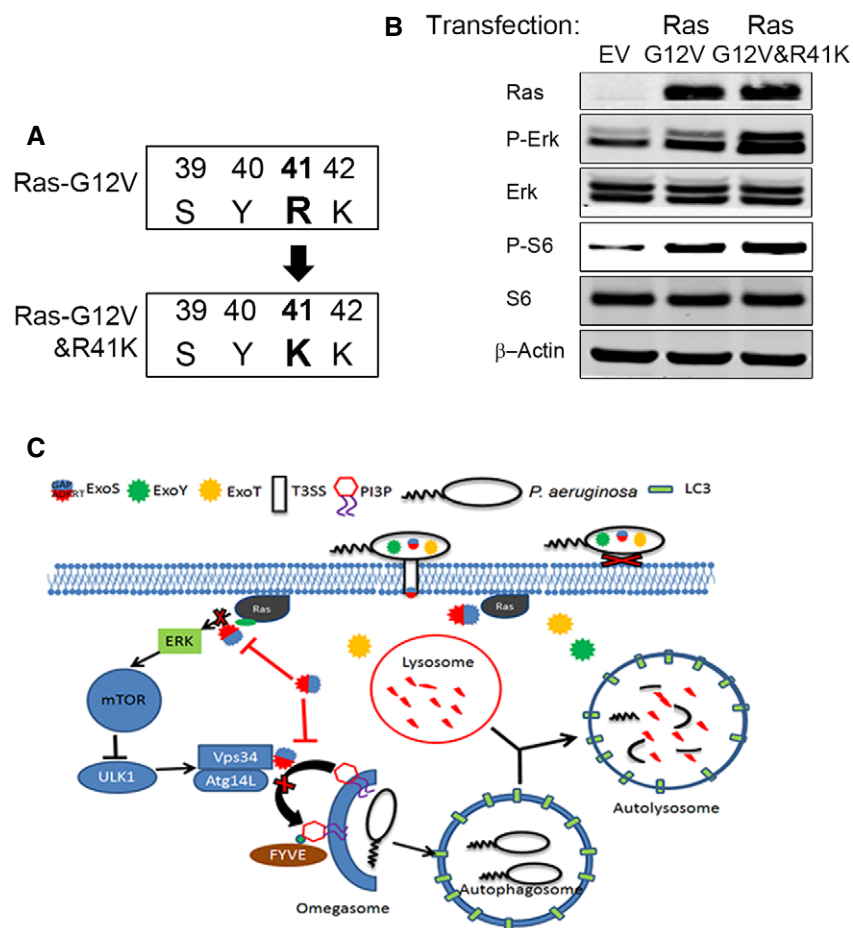

**Figure EV5. Evaluation of cellular activity of Ras mutants and Working model of ExoS facilitates intracellular survival of *P. aeruginosa* by inhibiting autophagy and mTOR.**

- A Schematic of the generation of Ras-G12V&R41K from Ras-G12V.
- B A549 cells were transfected, for 24 h, with plasmids containing empty vector (EV), Ras-G12V or Ras-G12V&R41K and cell lysates were evaluated by immunoblotting.
- C Working model of *P. aeruginosa* ExoS role in inhibiting host cells autophagy and mTOR to facilitate intracellular bacterial survival. *P. aeruginosa* injects toxins including ExoS, ExoY, and ExoT through the T3SS. ExoS-mediated ADP ribosylation of RAS and leads to inhibition of mTOR. In addition, ExoS's ADP ribosylation activity suppresses autophagy initiation complex Atg14L-Vps34 kinase activity preventing autophagosome formation. The inhibition of autophagy by ExoS ADP ribosylation protects bacteria from elimination by autolysosome digestion.

Source data are available online for this figure.
