# Supplementary material
Source: PubMed Central journal article supplement (PMC7857434)
Supplement: EMBR-22-e50613-s009.pdf [file EMBR-22-e50613-s009.pdf]

Fig8A

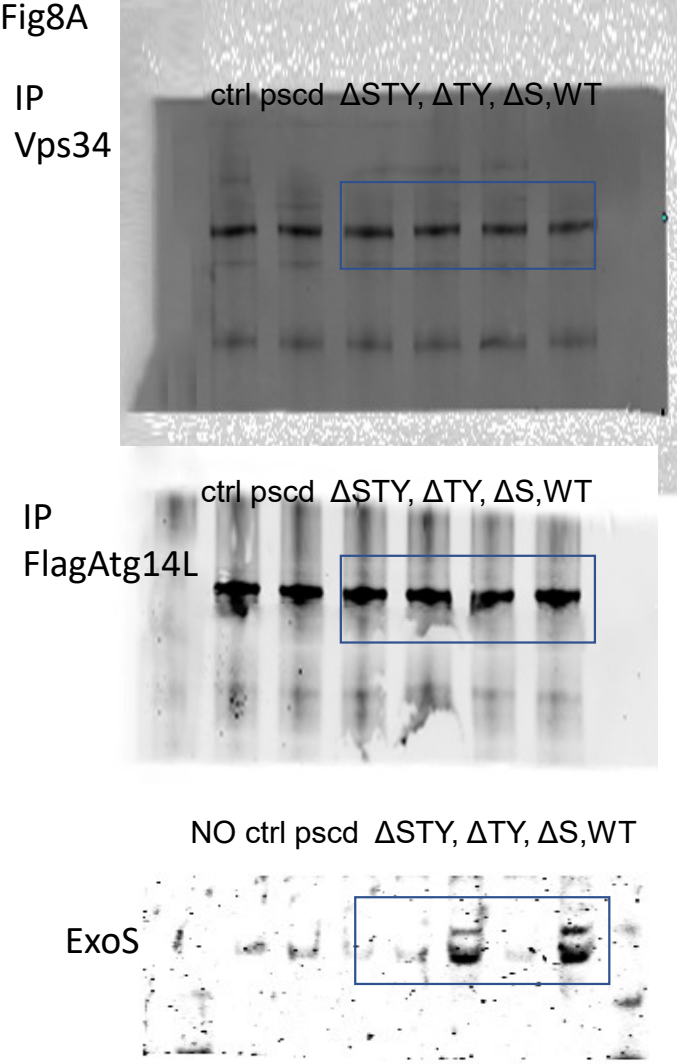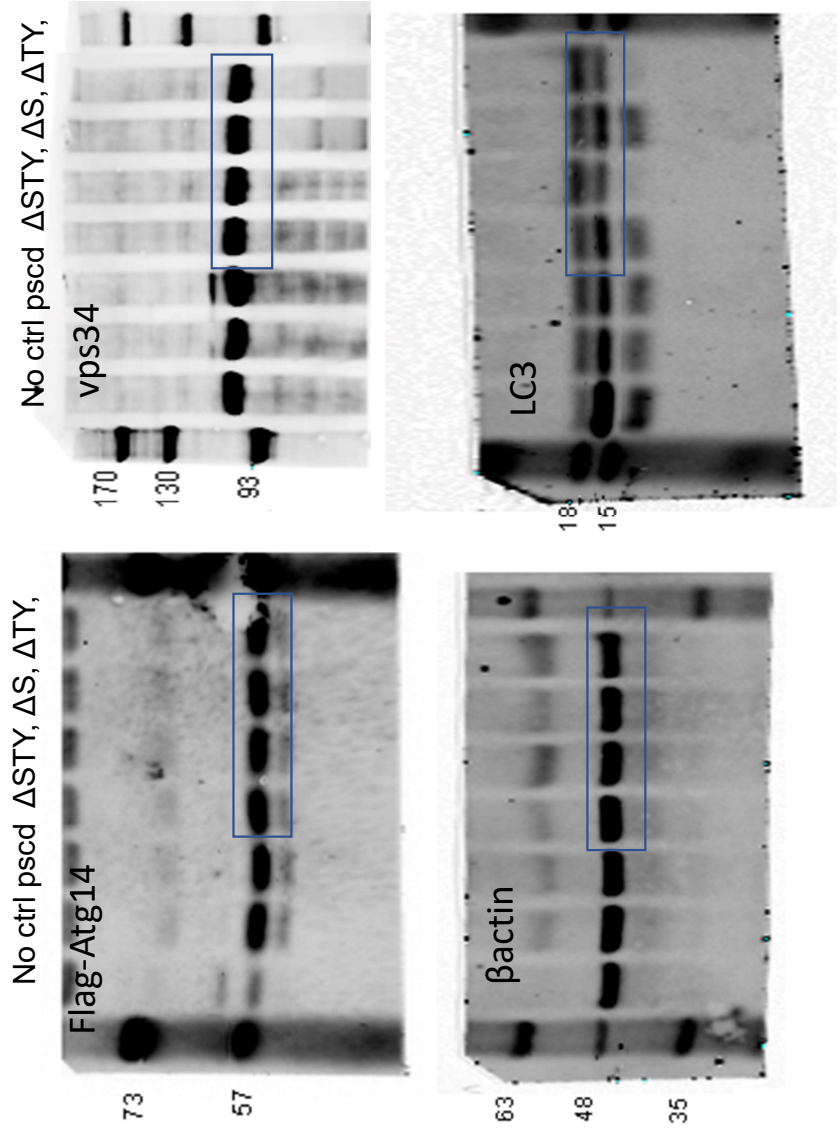

Fig8B

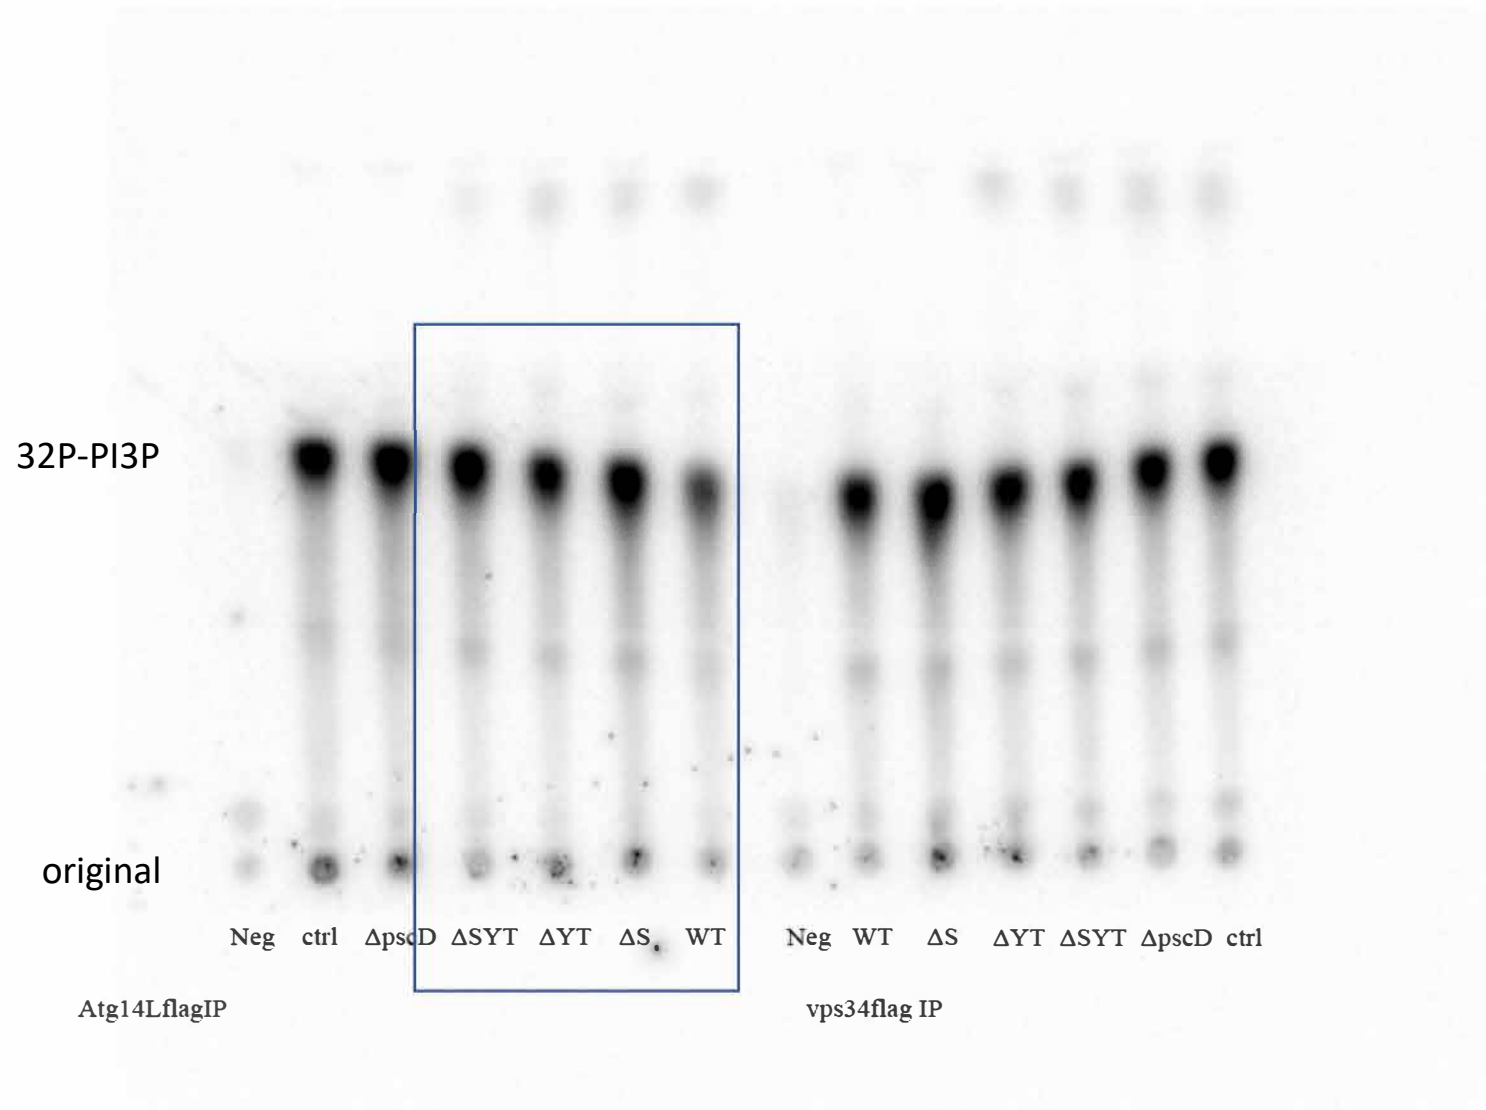

Fig8C

IP

Vps34

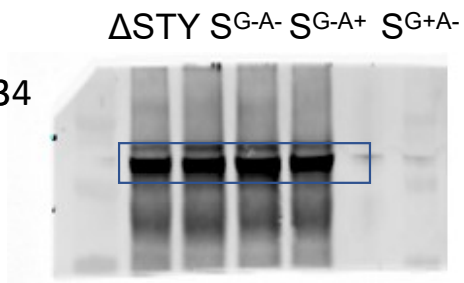

IP

FlagAtg14L

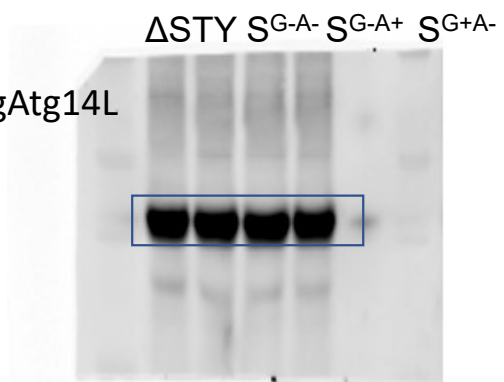

None  $\Delta$ STY S<sup>G-A-</sup> S<sup>G-A+</sup> S<sup>G+A-</sup>

ExoS

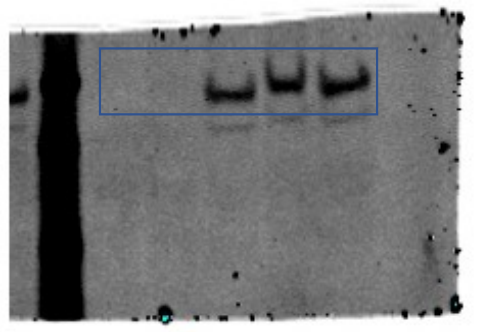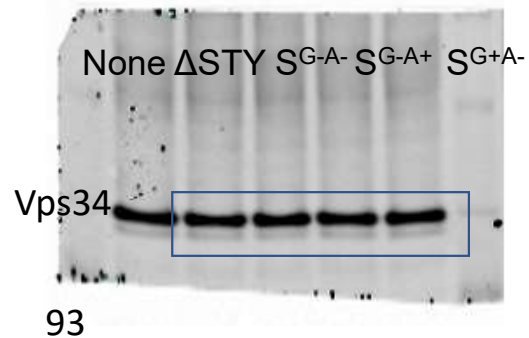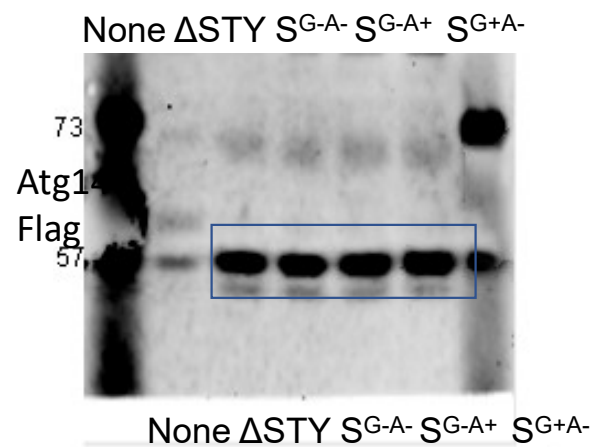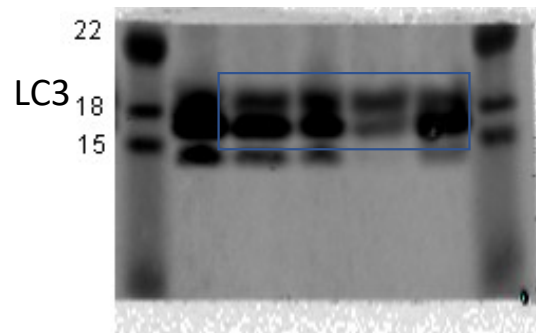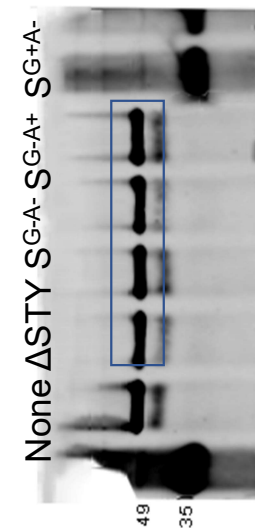

$\beta$ actin

Fig8D

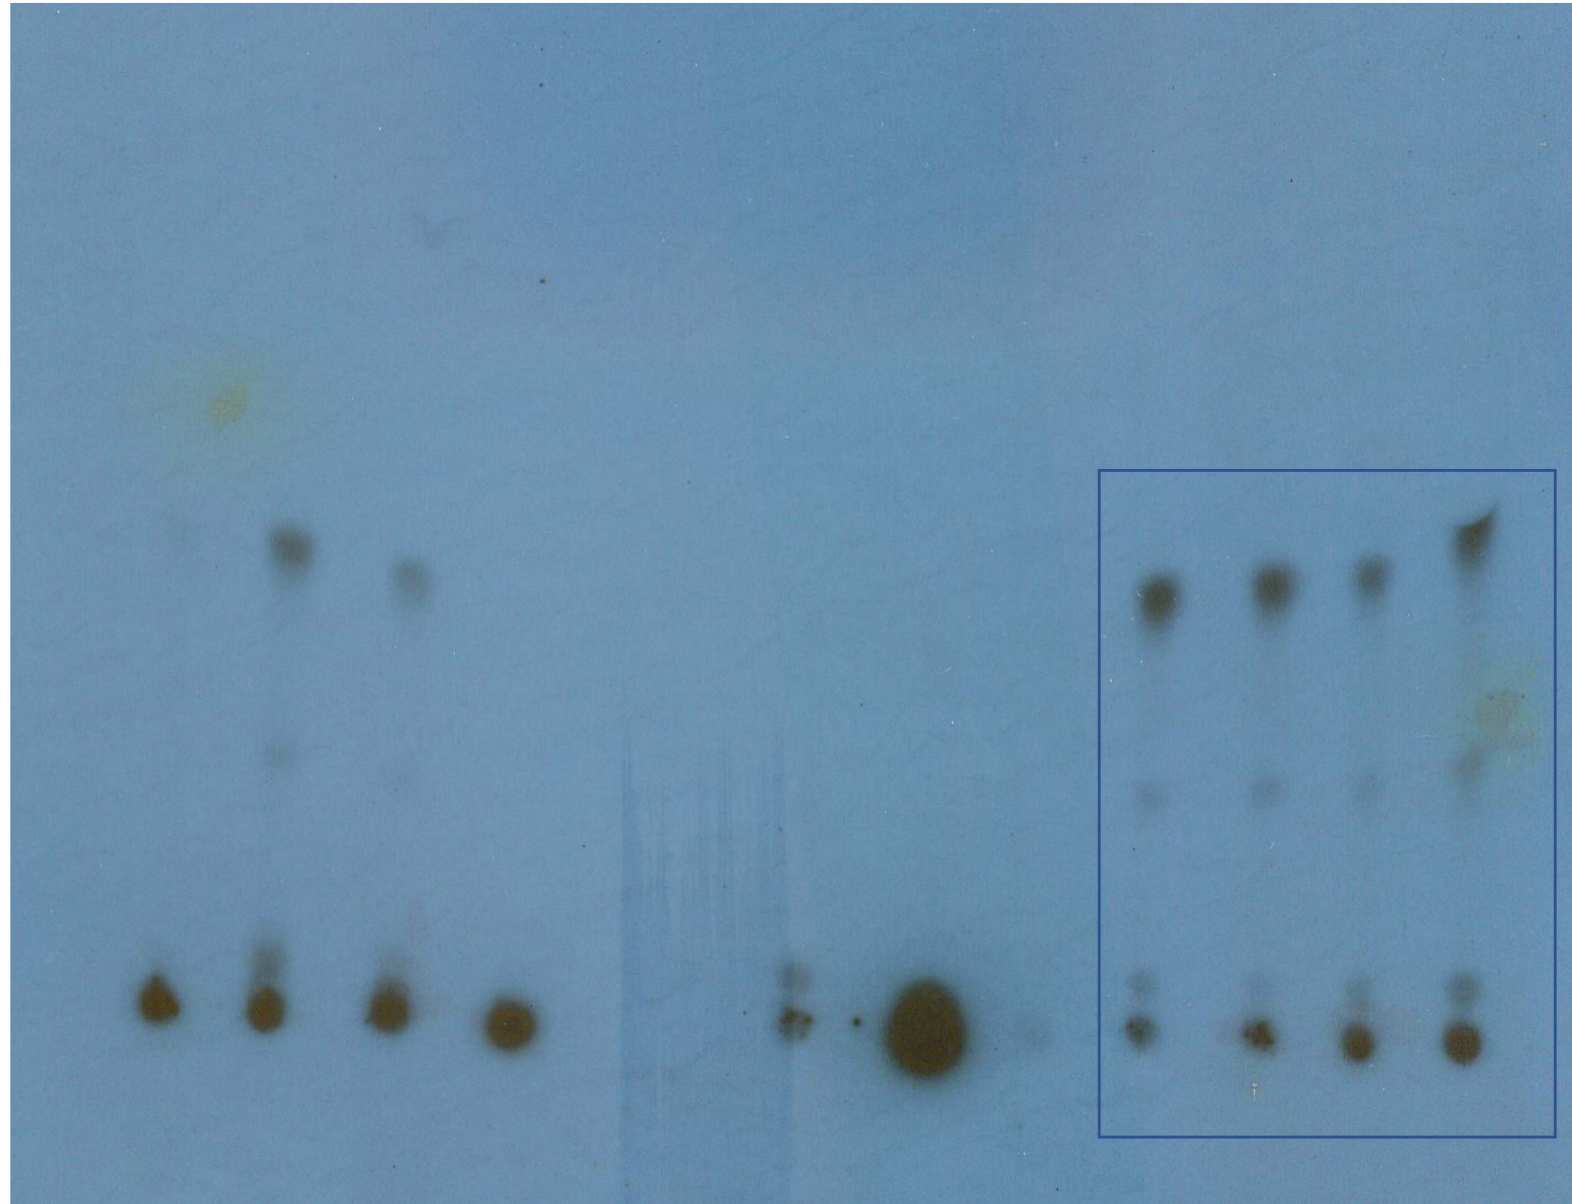

$^{32}\text{P}$ -PI3P

original
