# Supplementary material
Source: PubMed Central journal article supplement (PMC7857434)

Fig1A

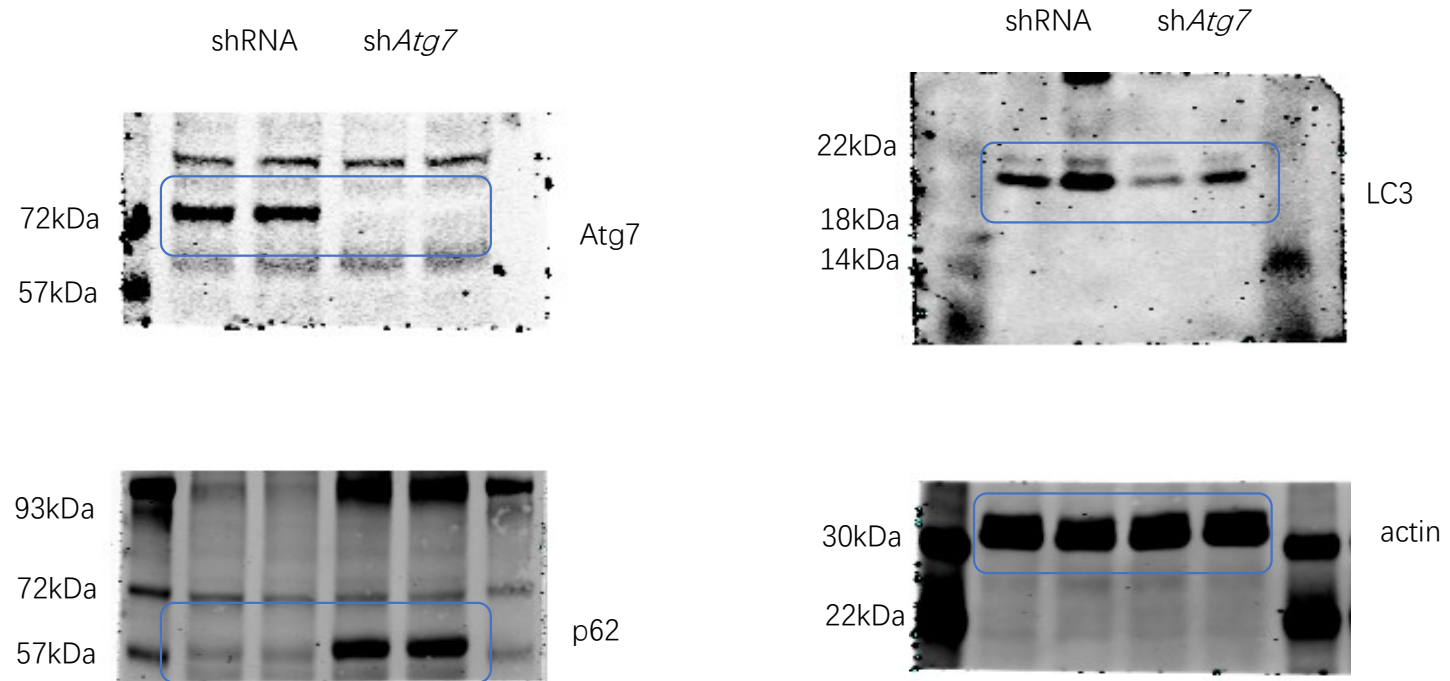

Supplement: EMBR-22-e50613-s002.pdf [file EMBR-22-e50613-s002.pdf]

Fig2A

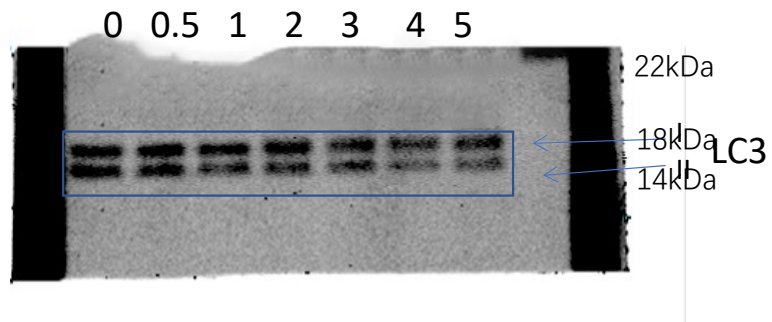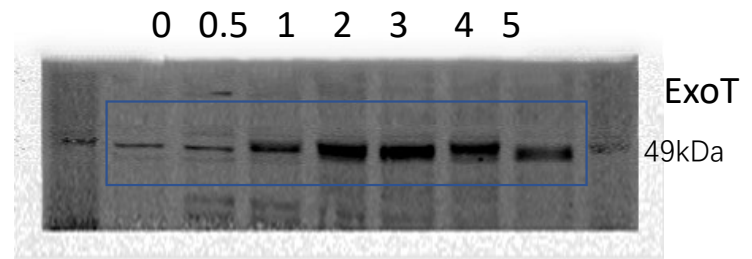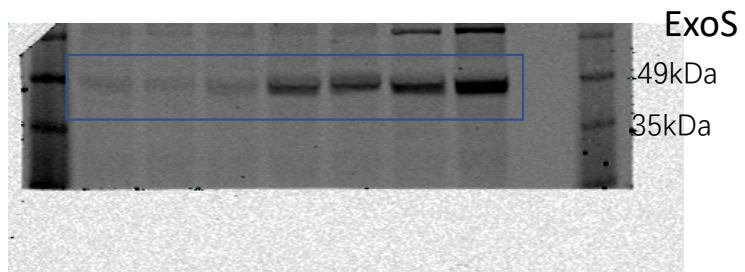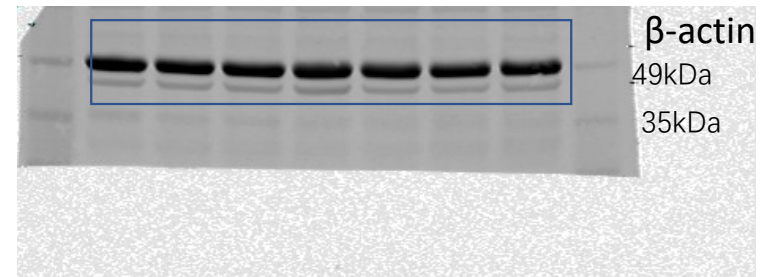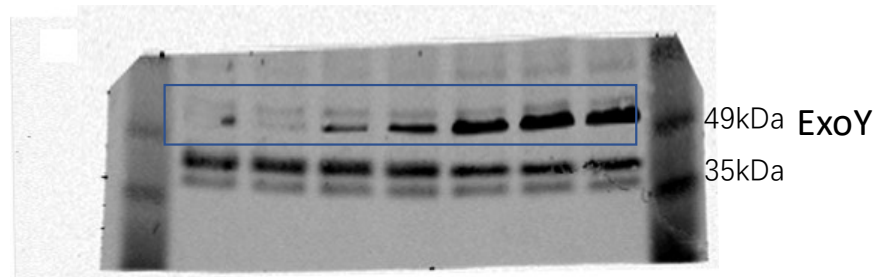

Fig2B

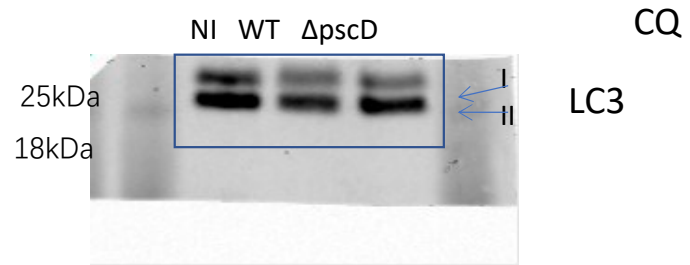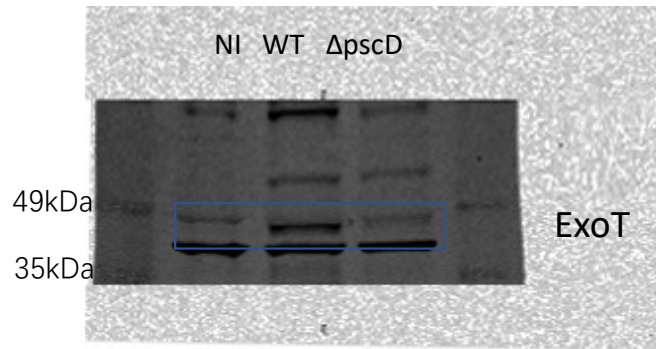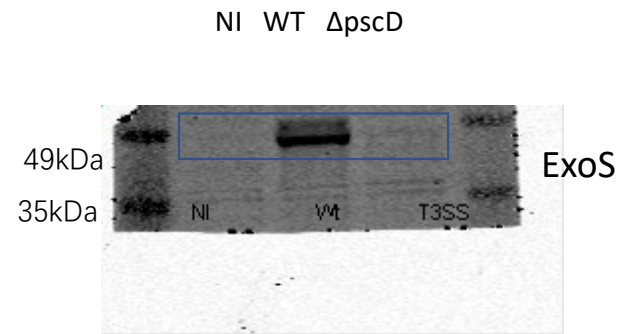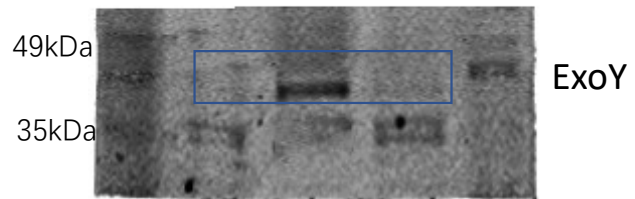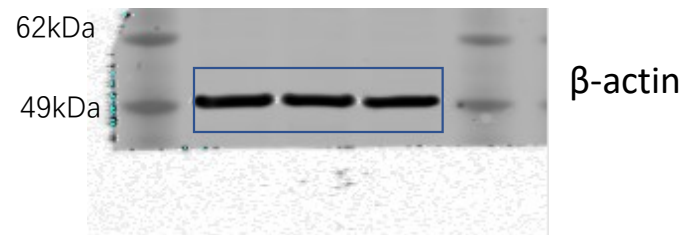

Fig2C

NI

WT

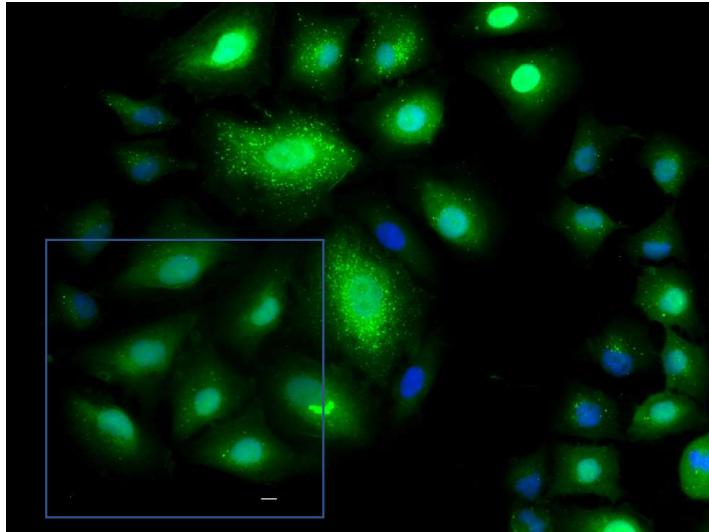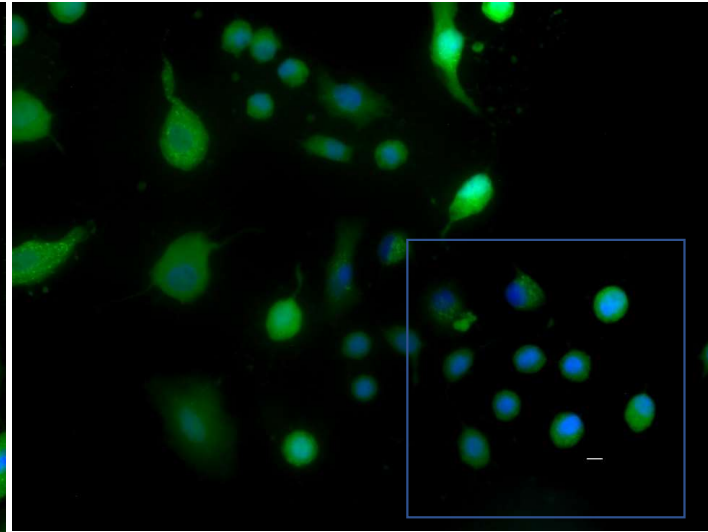

$\Delta$ psCD

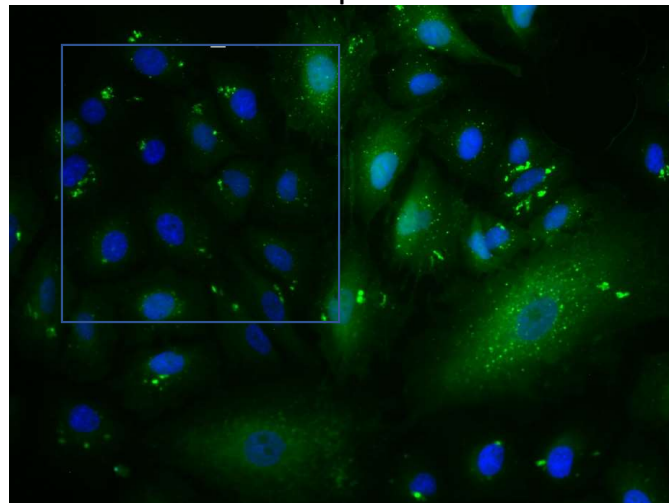

Supplement: EMBR-22-e50613-s003.pdf [file EMBR-22-e50613-s003.pdf]

Fig3B

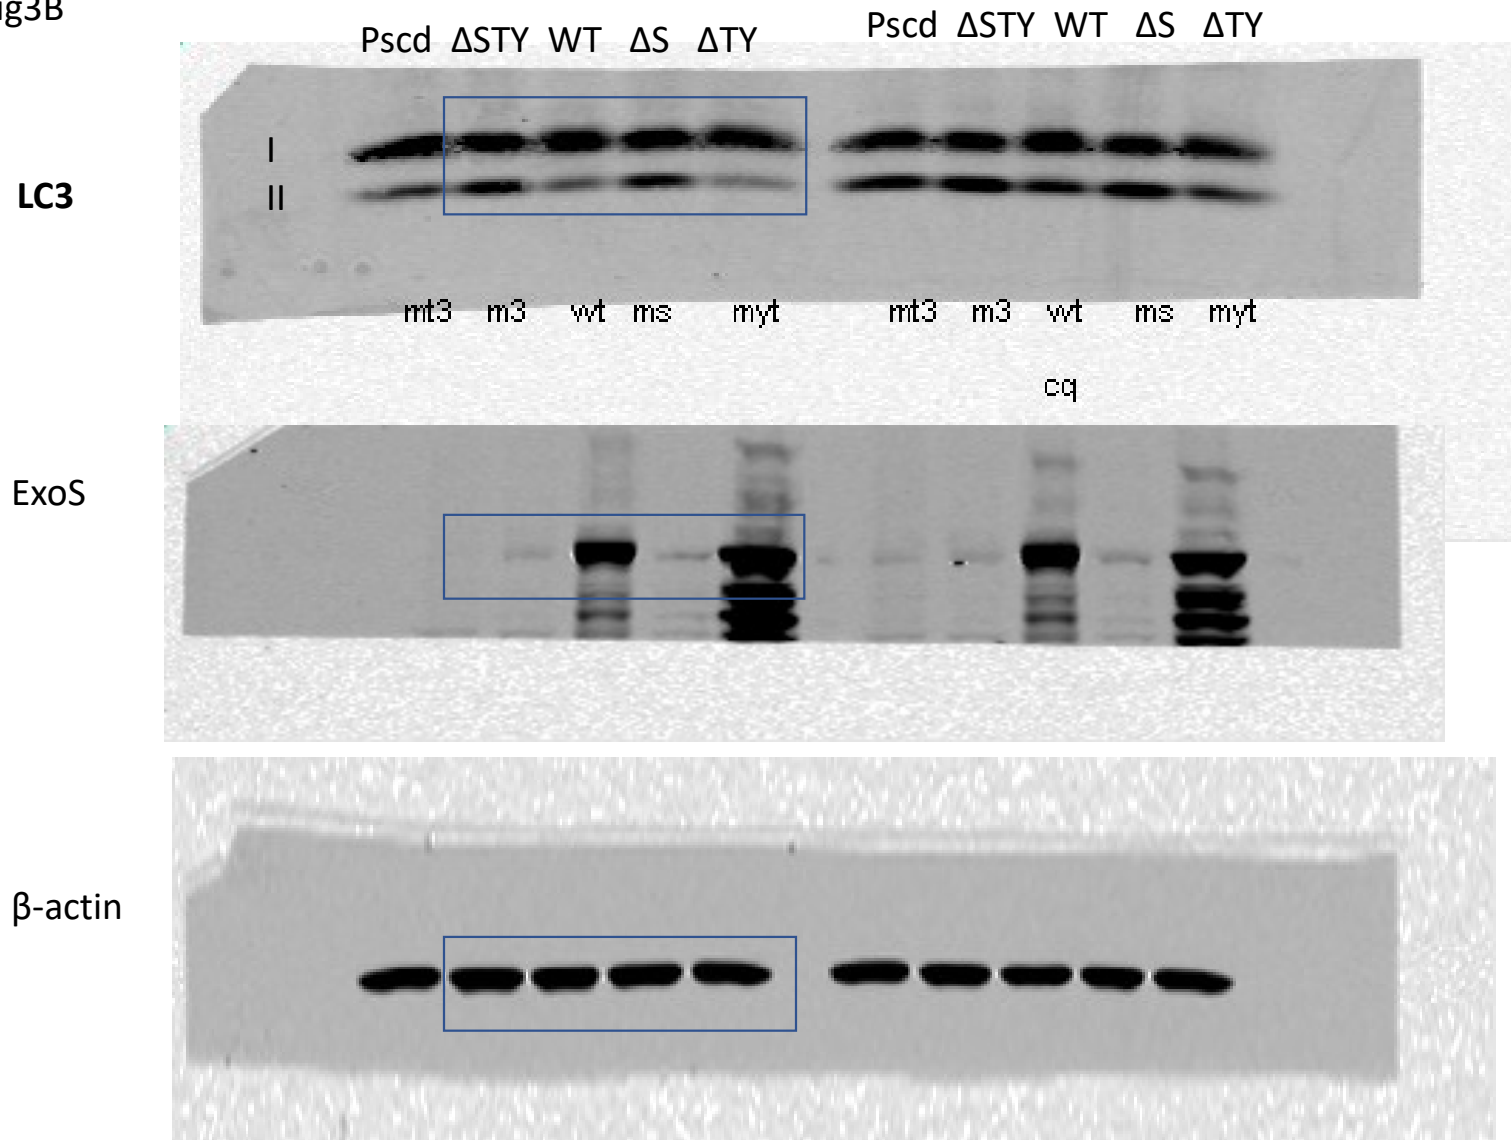

Fig3C

$\Delta$ STY

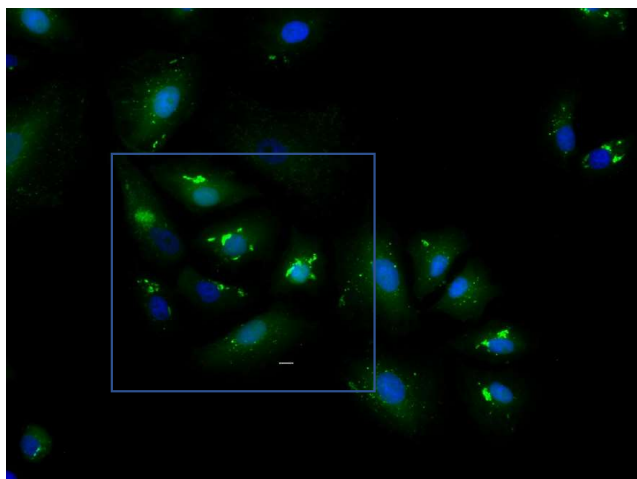

WT

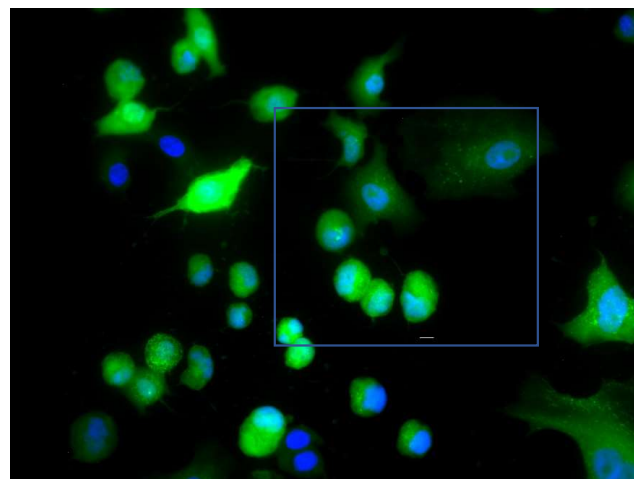

$\Delta$ S

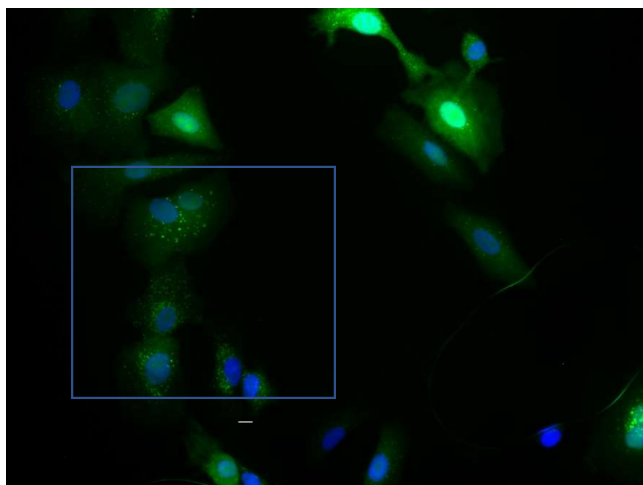

$\Delta$ TY

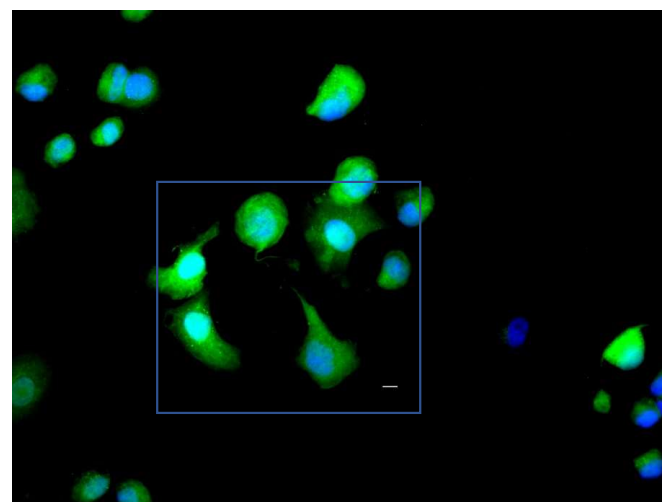

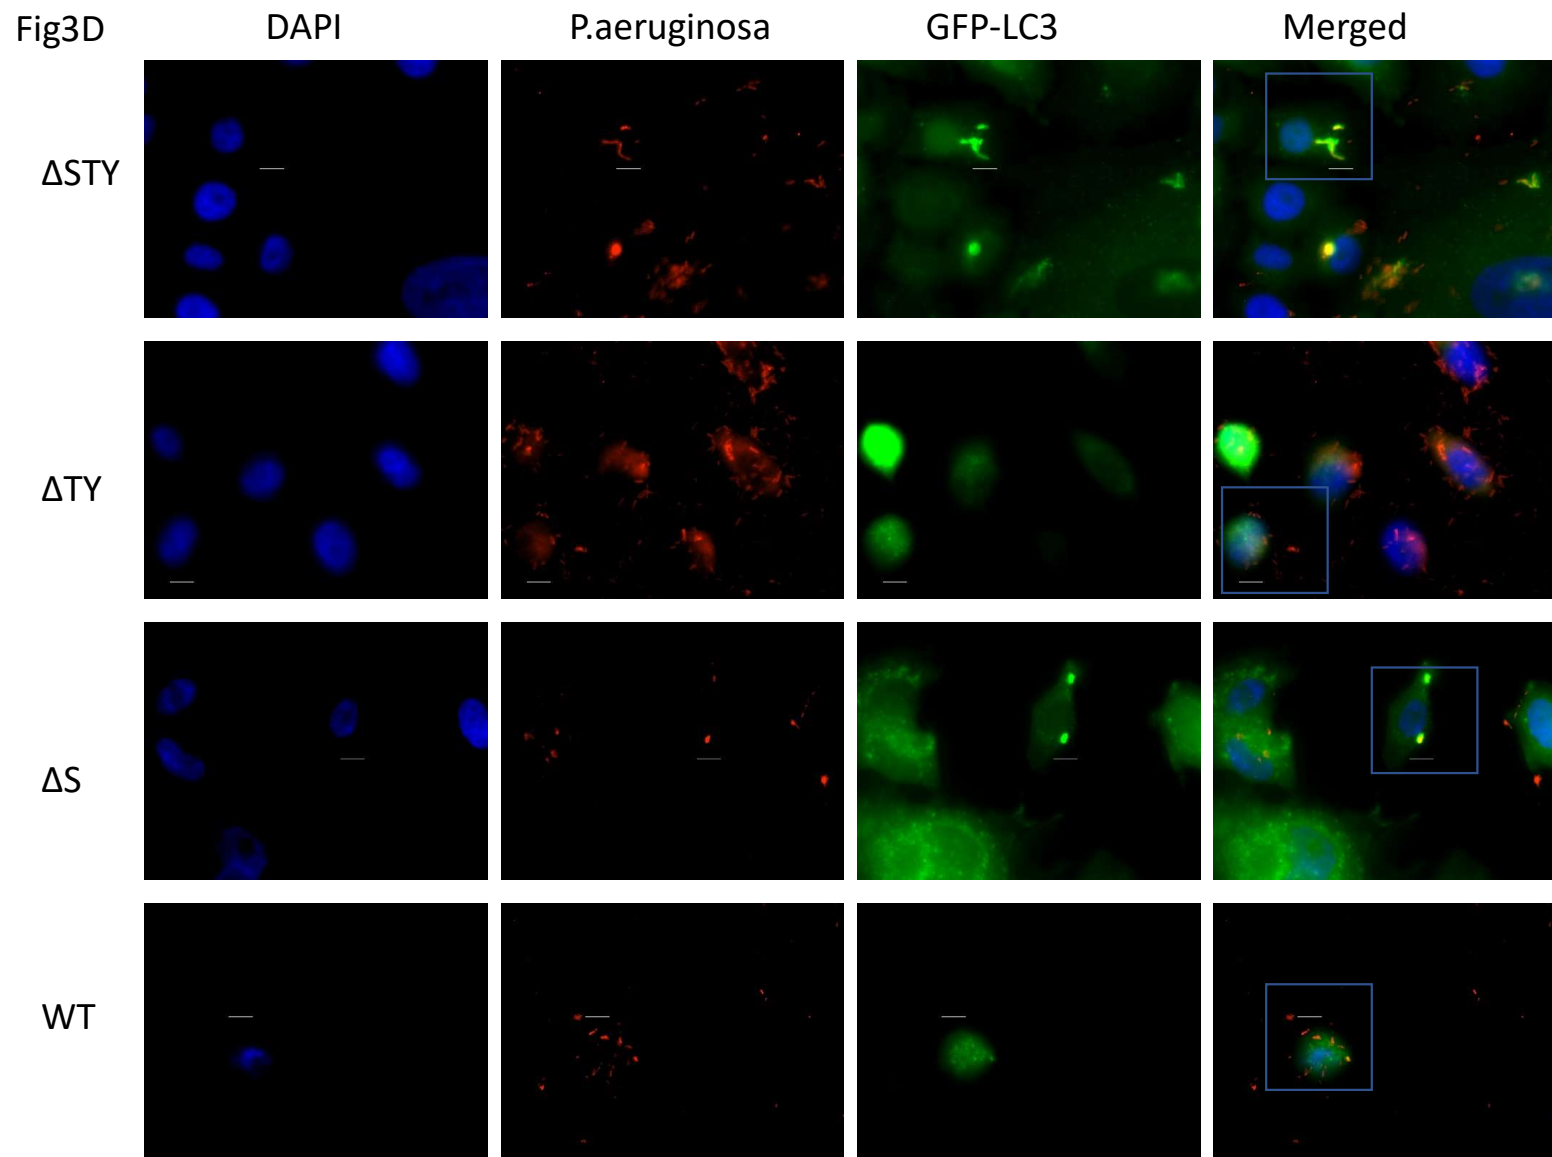

Supplement: EMBR-22-e50613-s004.pdf [file EMBR-22-e50613-s004.pdf]

Fig4A

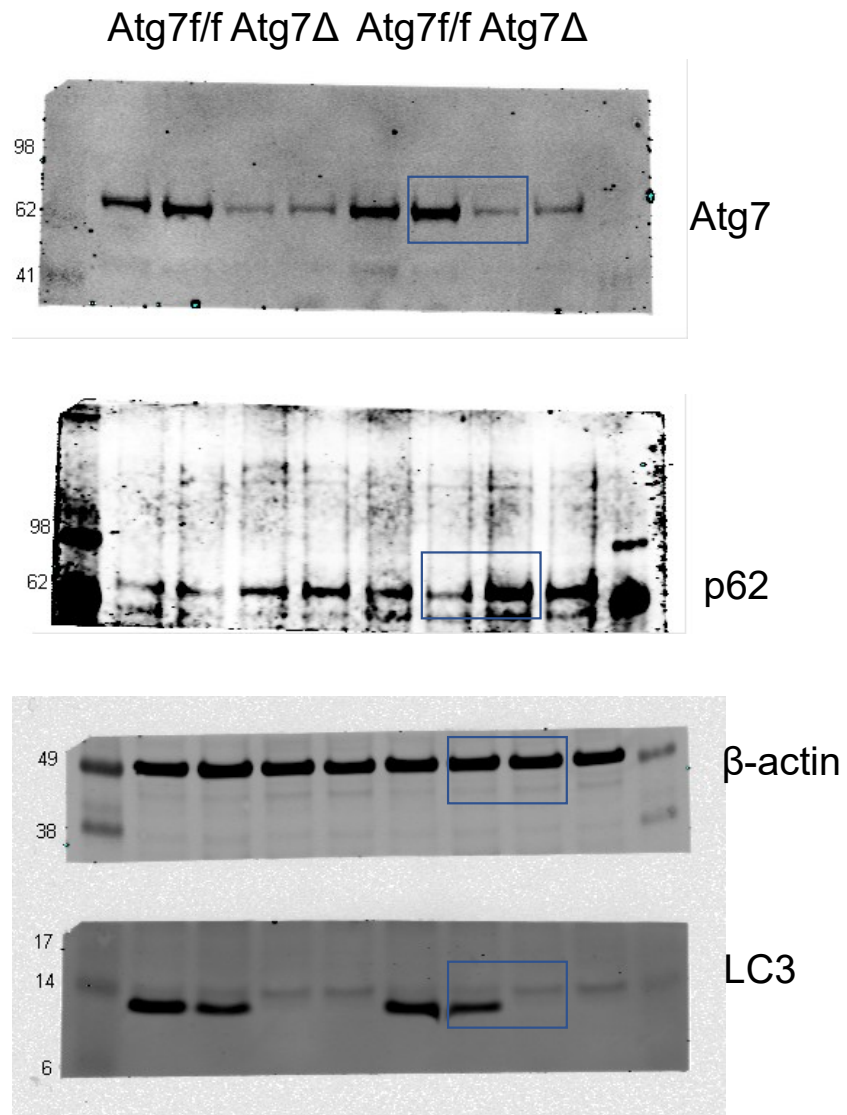

Supplement: EMBR-22-e50613-s005.pdf [file EMBR-22-e50613-s005.pdf]

Fig5B

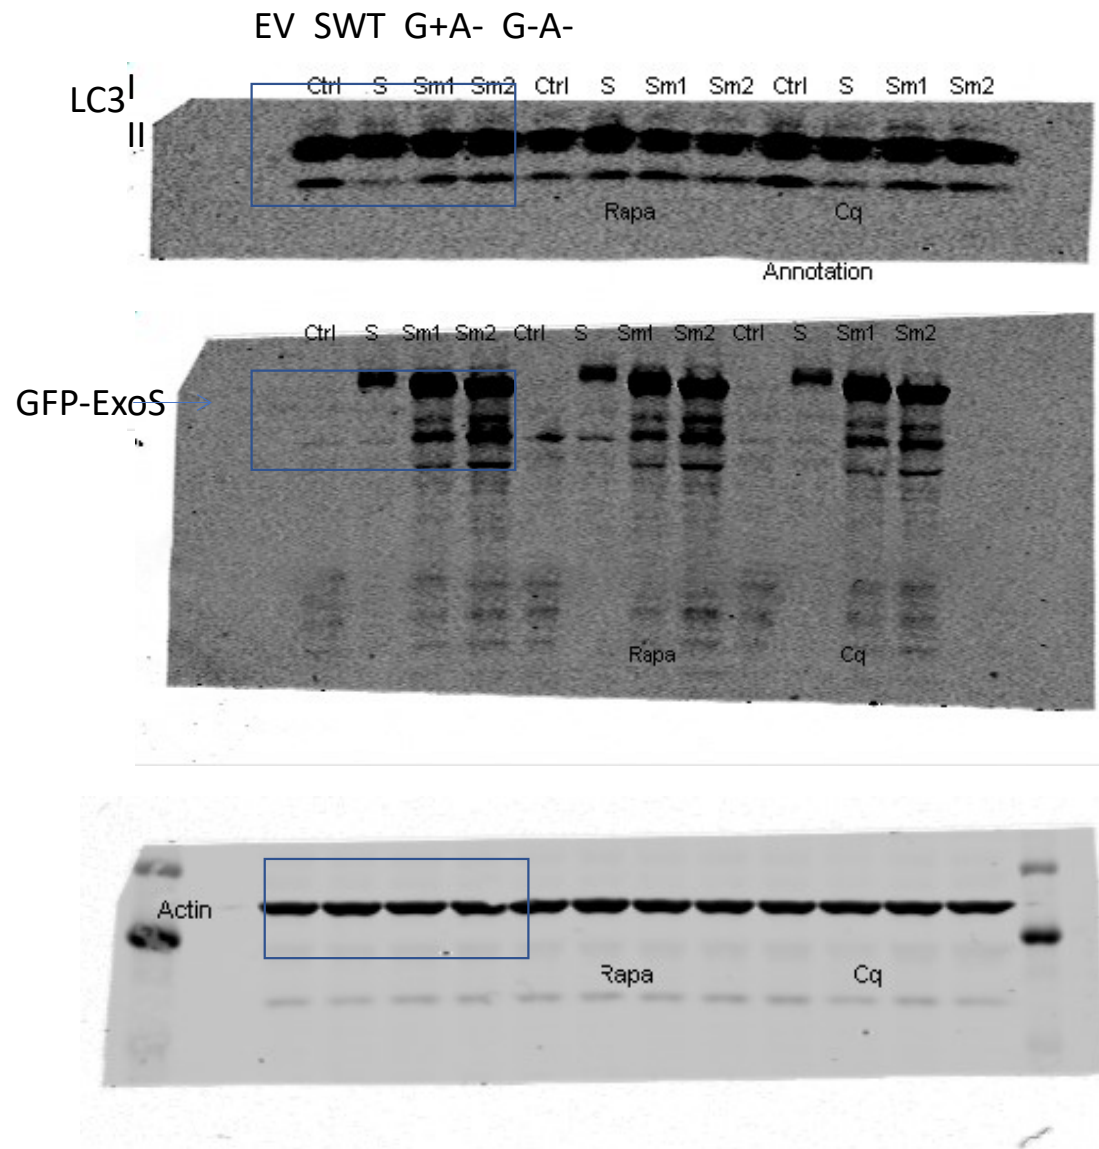

Fig5C

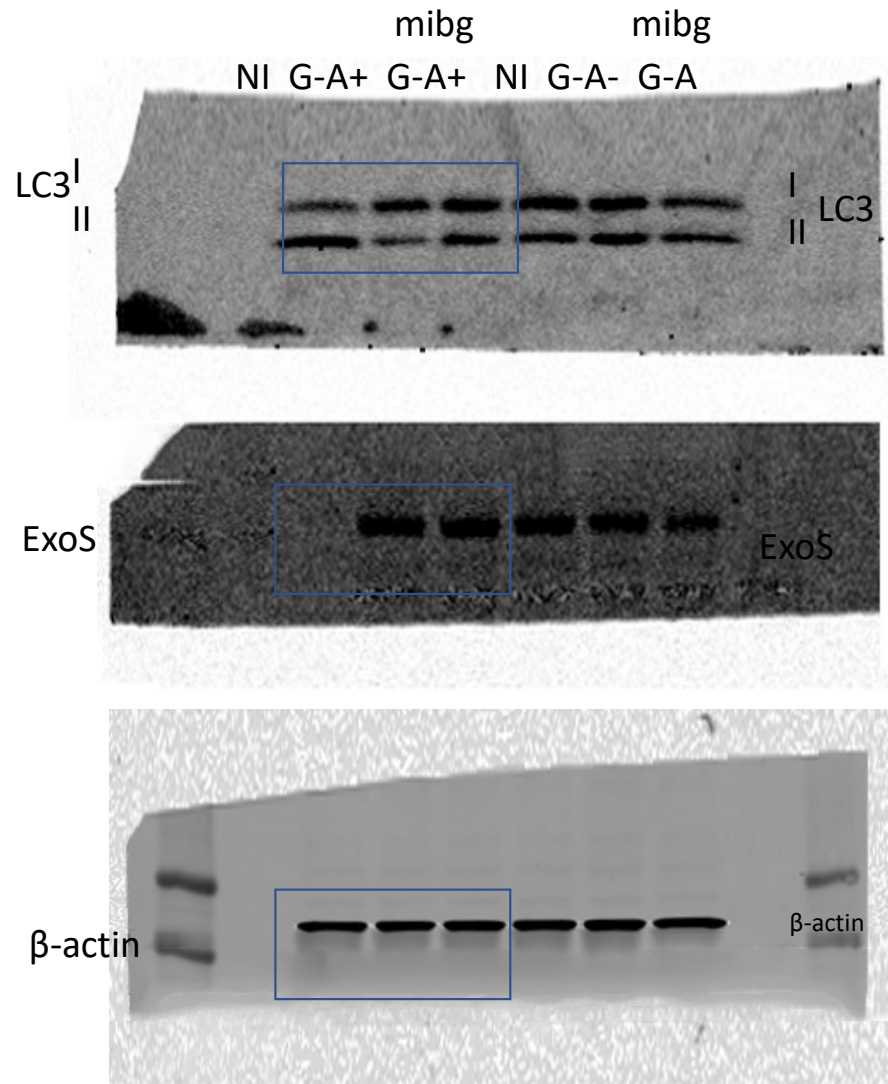

Fig5D

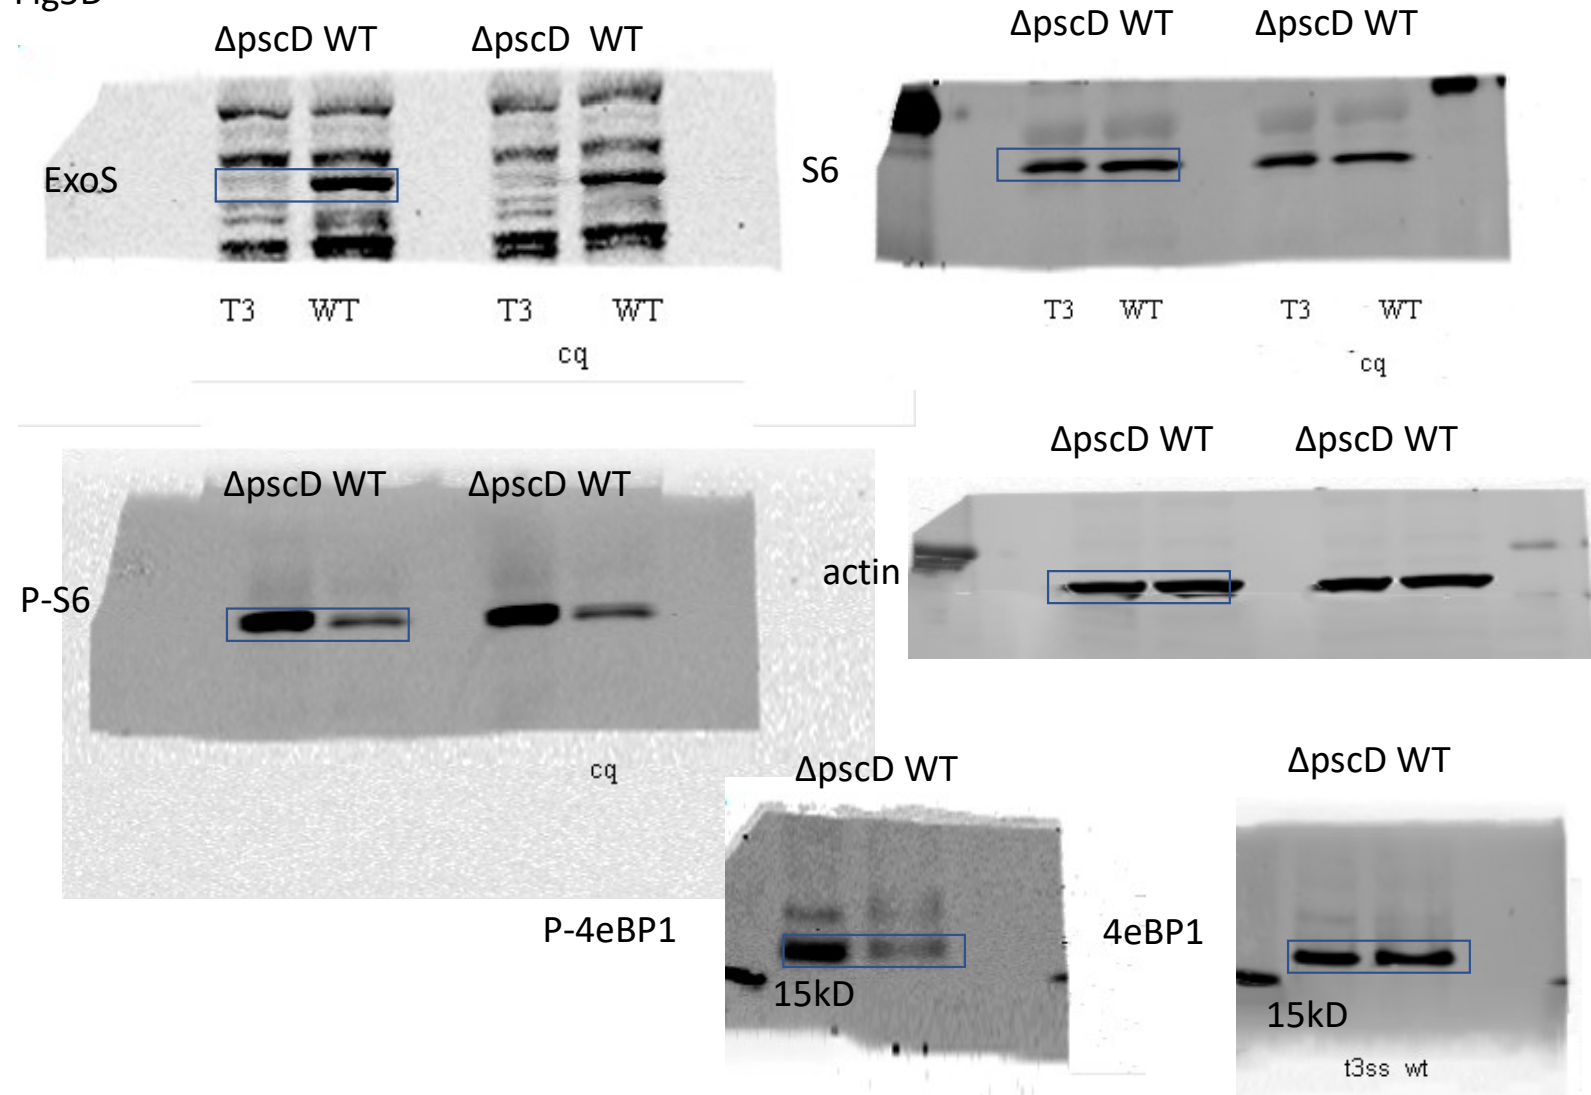

Fig5E

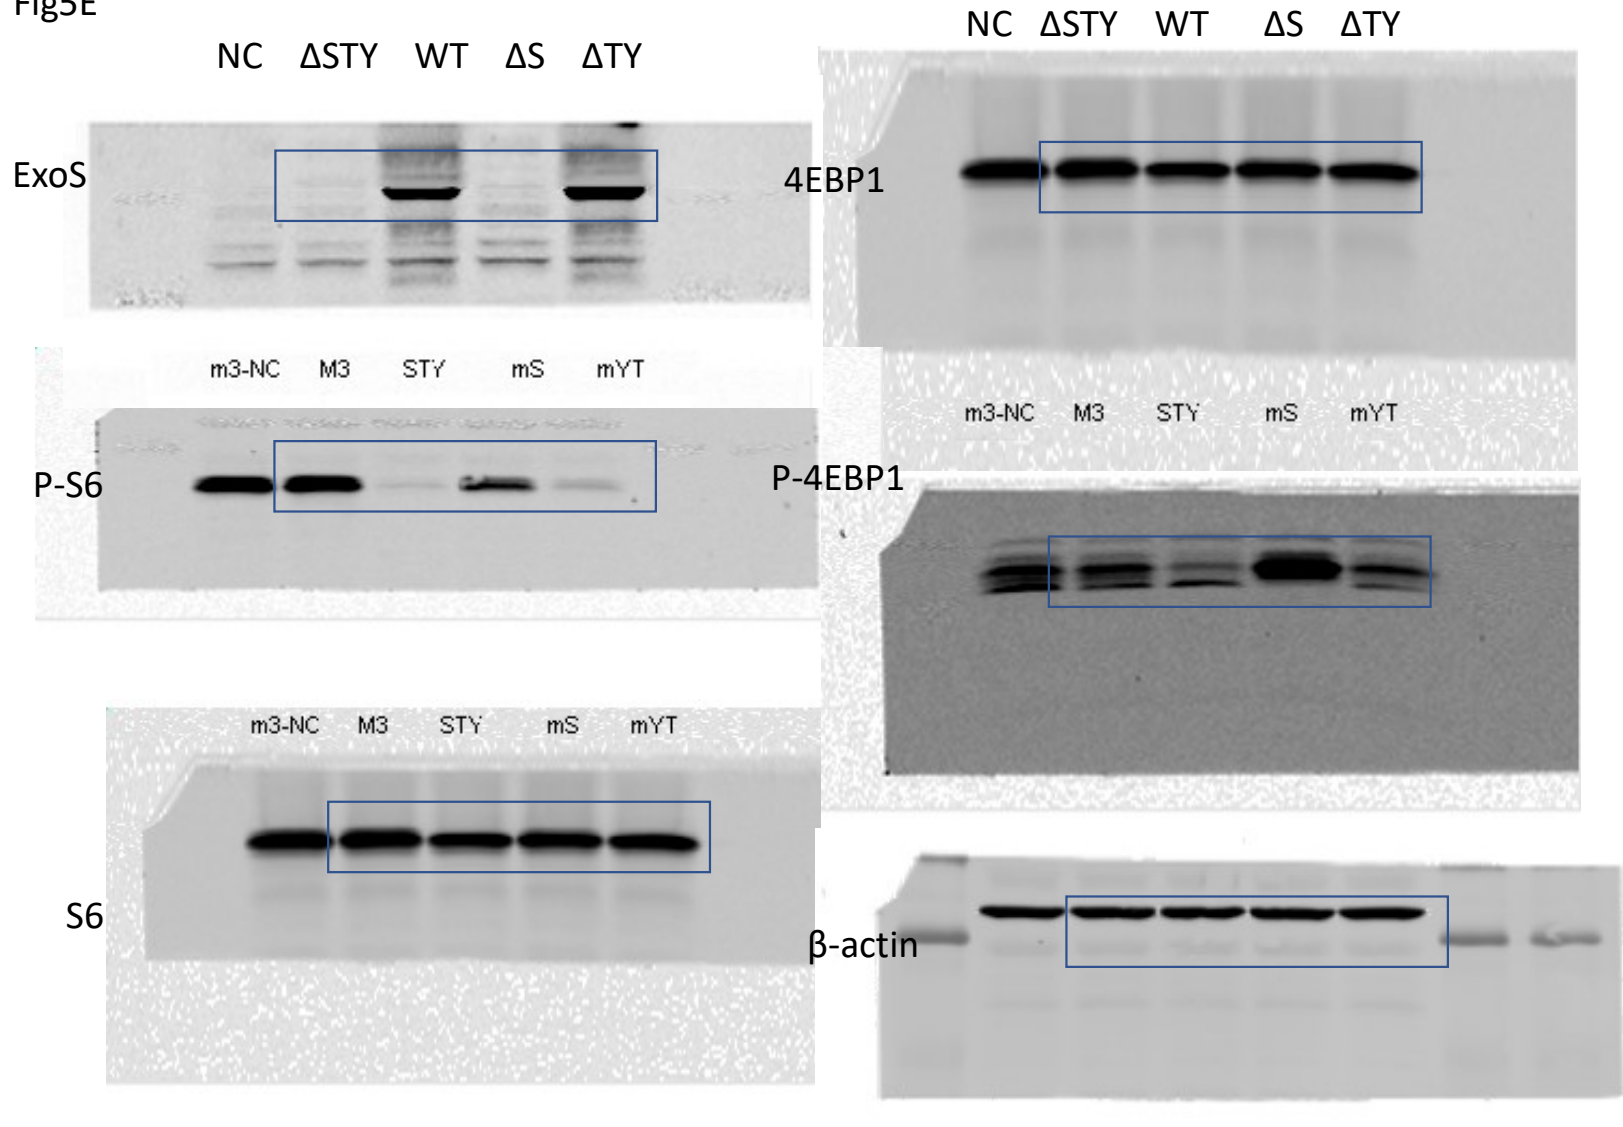

Fig5F

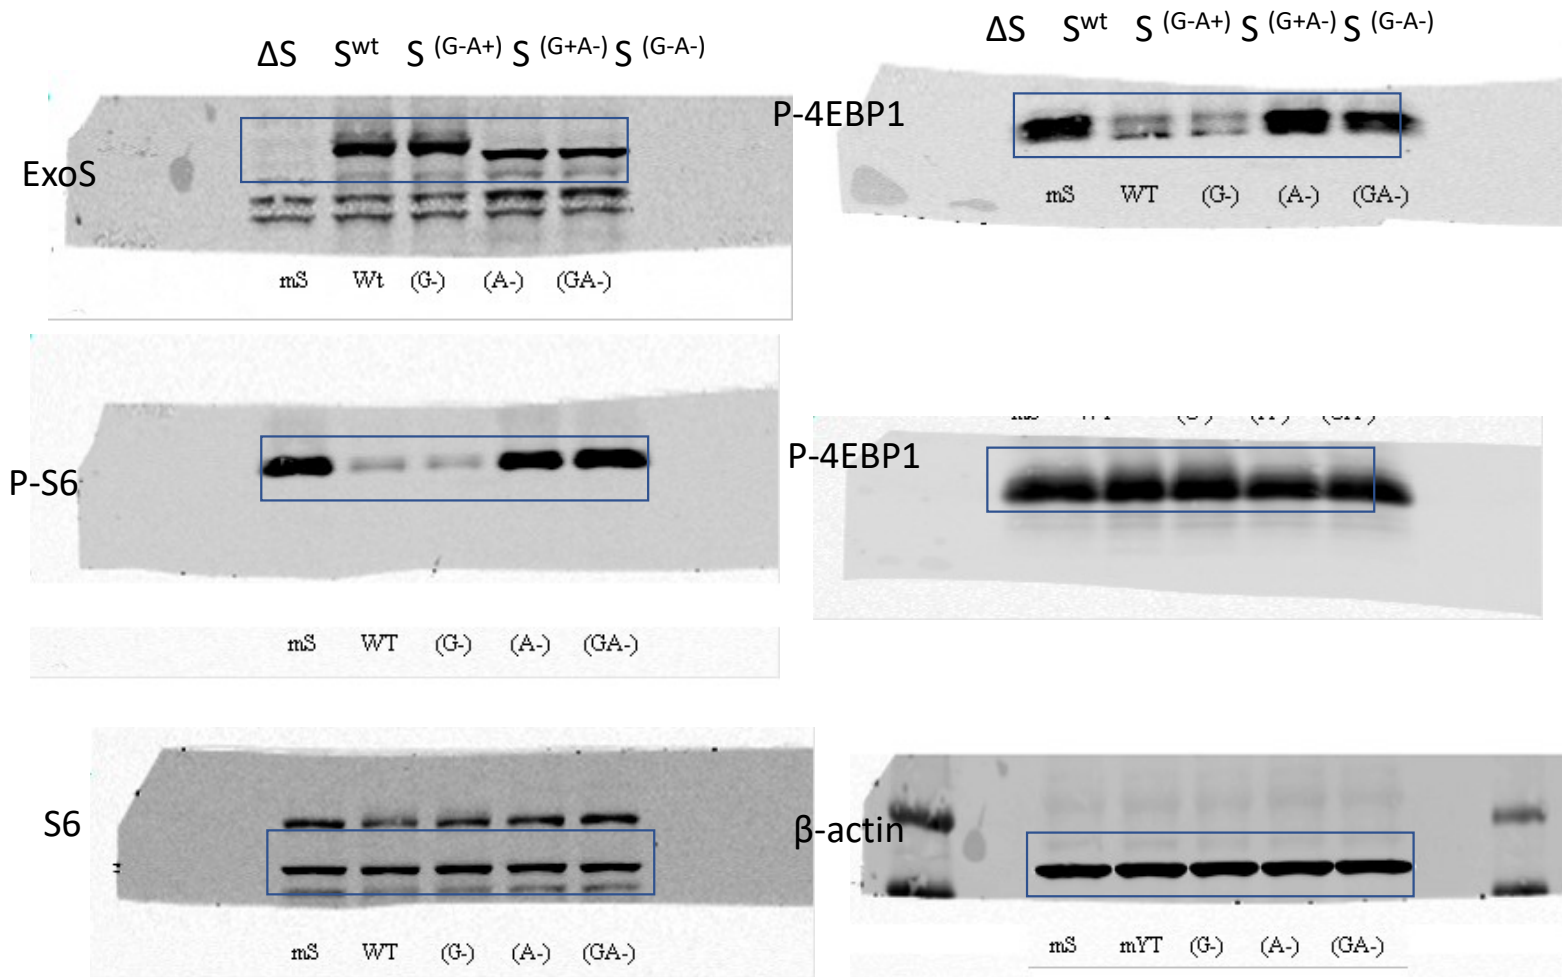

Supplement: EMBR-22-e50613-s006.pdf [file EMBR-22-e50613-s006.pdf]

Fig6A

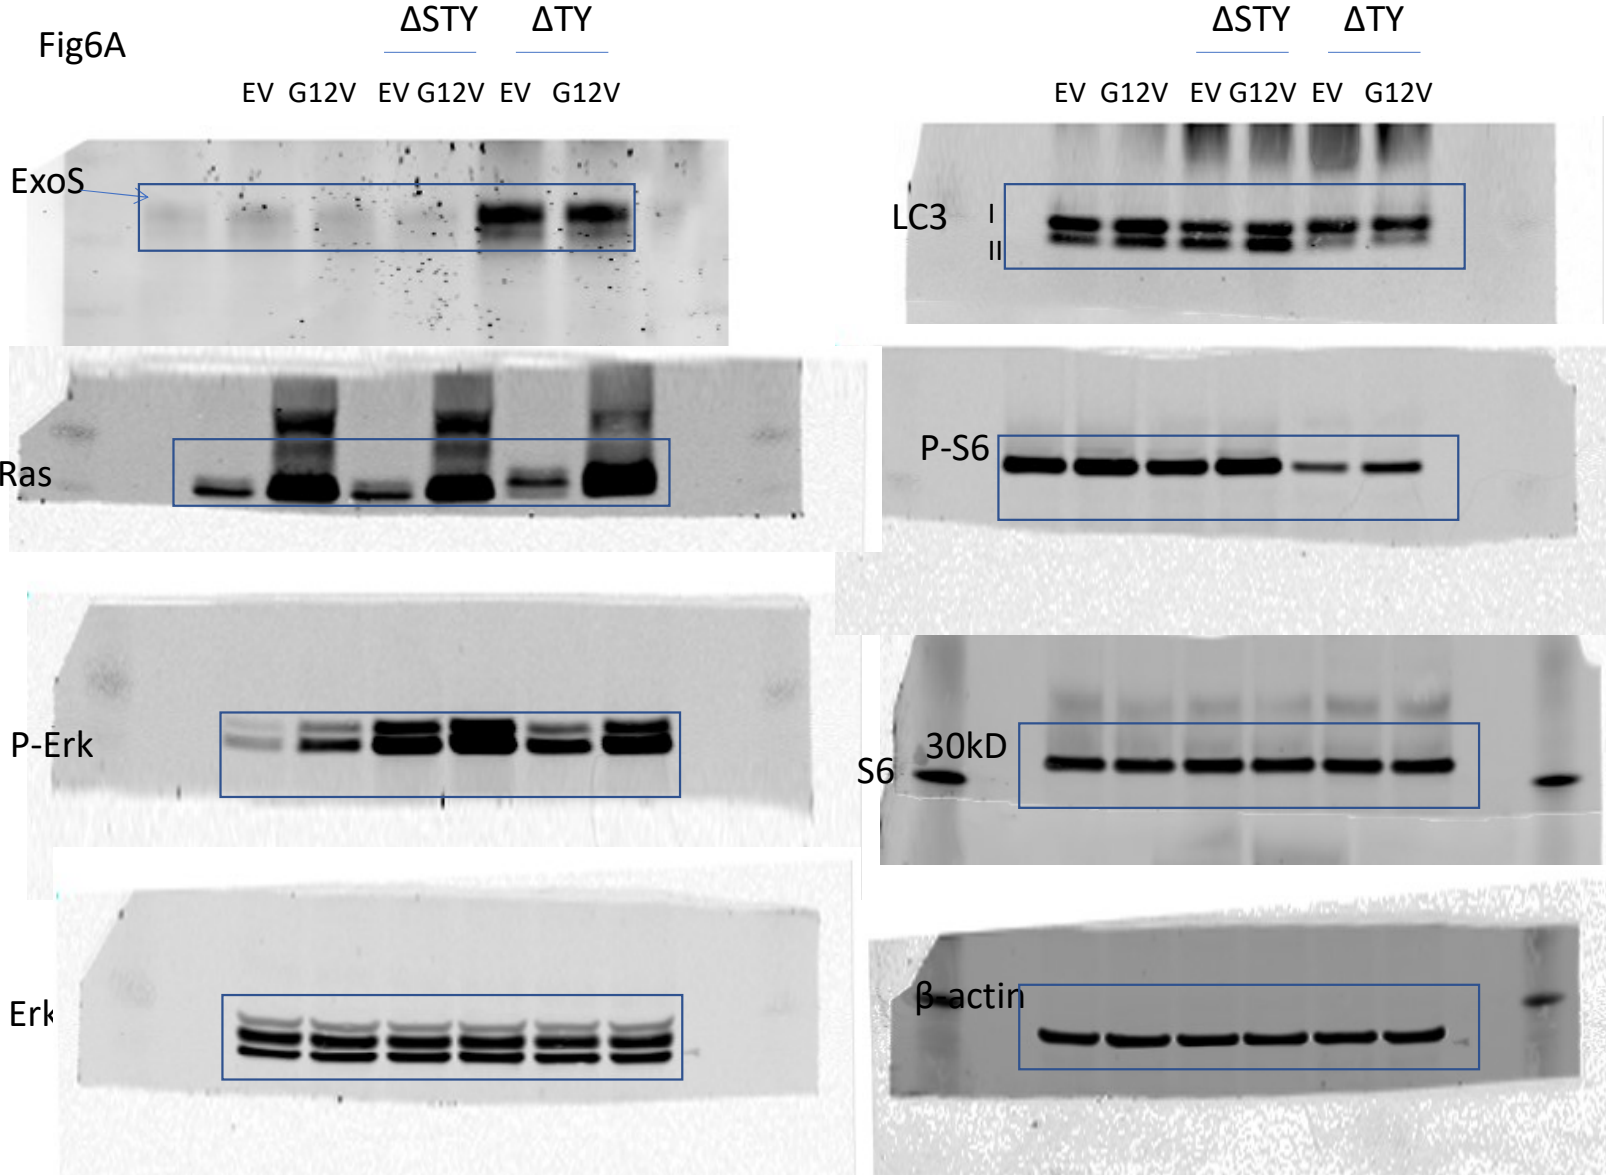

Supplement: EMBR-22-e50613-s007.pdf [file EMBR-22-e50613-s007.pdf]

Fig7A

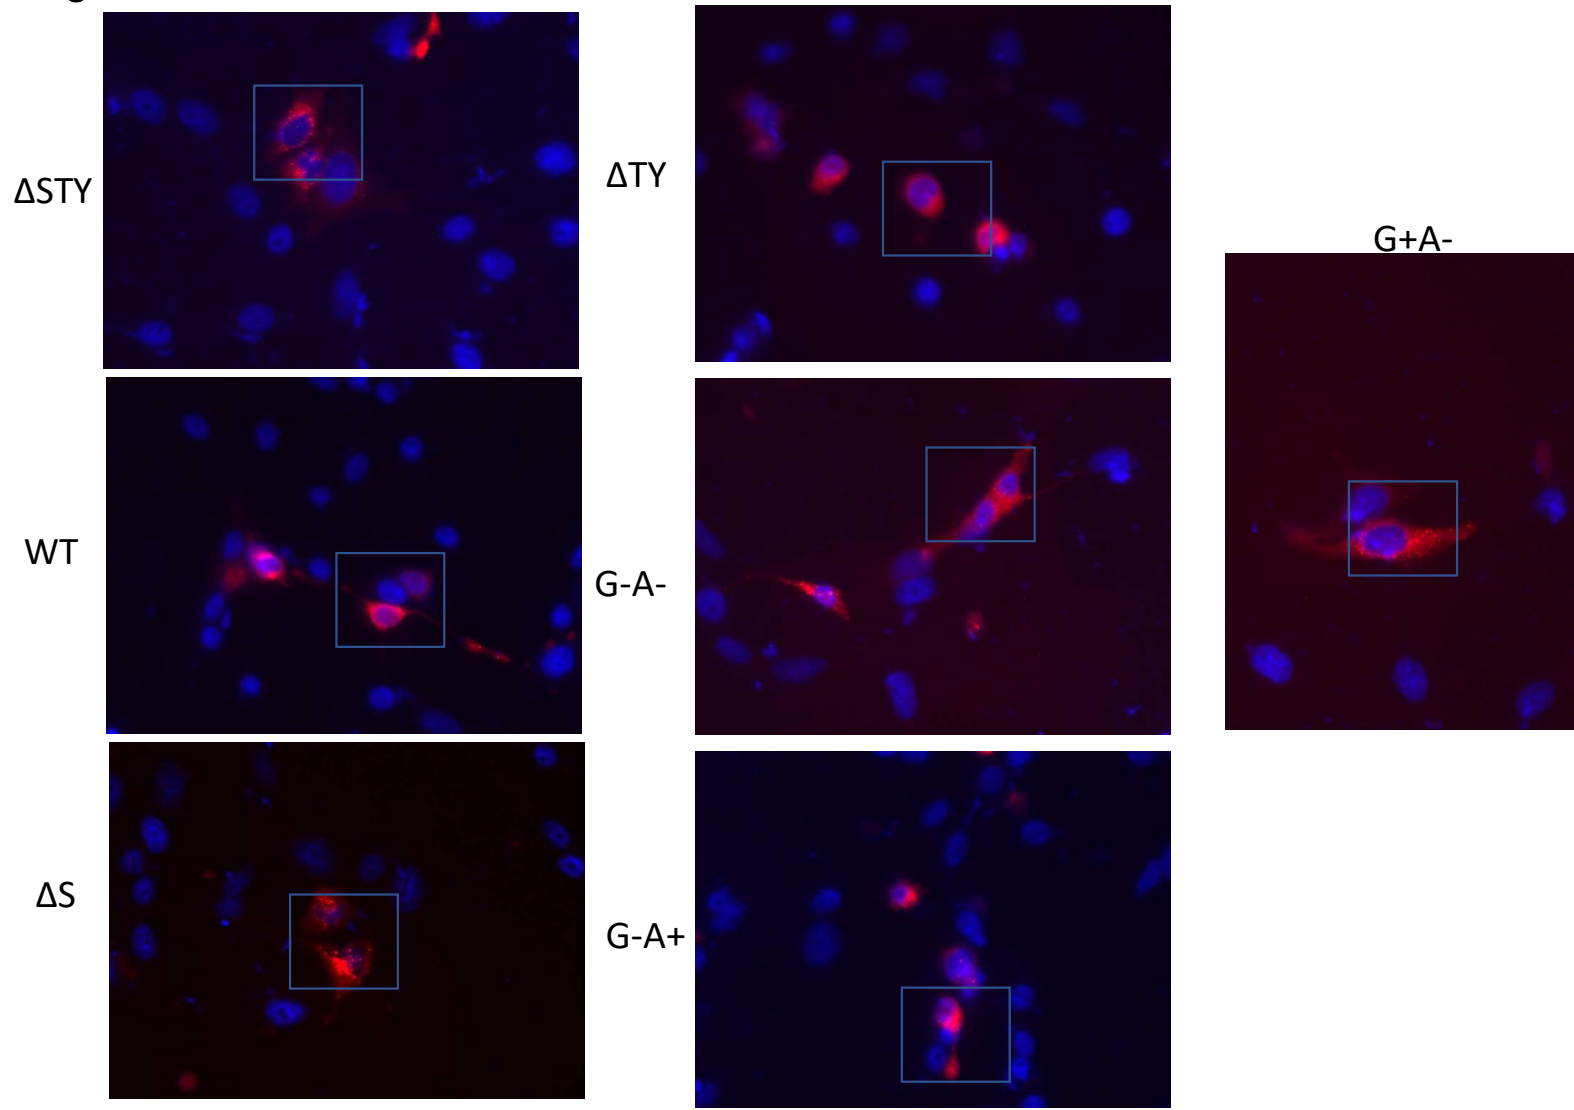

Supplement: EMBR-22-e50613-s008.pdf [file EMBR-22-e50613-s008.pdf]
